# Supplementary material
Source: MDPI journal article supplement (https://www.mdpi.com/2077-1312/7/6/188)
Supplement: s1 [file s1]

How to implement wave parameterization in simulations.

- Delft3D source code available at Deltares SVN repository:

[https://svn.oss.deltares.nl/repos/delft3d/branches/research/Utrecht\\_University/20171019-Marcio-cross-shore\\_wave\\_sand-transport-v1](https://svn.oss.deltares.nl/repos/delft3d/branches/research/Utrecht_University/20171019-Marcio-cross-shore_wave_sand-transport-v1)

A free subscription is needed to access the repository. Please refer to:

<https://oss.deltares.nl/web/delft3d>

- Implementation steps

Choice between IH and RUE is implemented inside TRA FILE.

Wform =1 for IH or Wform =2 for RUE; the file is case-sensitive.

1- In the mdf (master) file specify the keyword in "Additional parameters":

TraFrm = #filename.tra#

2- make a text file with same name and extension as specified above and use the example below:

[TransportFormulaFileInformation]

FileVersion = 01.00

[TransportFormula]

Number= -2 # Van Rijn (2007): TRANSPOR2004

Wform = 1

The implemented Wform will have an echo in the diagnose (tri-diag) file.
