# Supplementary material
Source: MDPI journal article supplement (https://www.mdpi.com/2077-1312/7/6/188)
Supplement: s1 [file s1]

# Flow, sediment and morphological model

| Version                       | FLOW2D3D Version 6.02.13.7697M |                       |                                                                      |
|-------------------------------|--------------------------------|-----------------------|----------------------------------------------------------------------|
| Code                          | Value                          | Unit                  | Description                                                          |
| <b>mdf file (master file)</b> |                                |                       |                                                                      |
| Dt                            | 0.05                           | [min]                 | Numerical time step                                                  |
| Ag                            | 9.81                           | [m/s <sup>2</sup> ]   | gravity                                                              |
| Rhow                          | 1025                           | [kg/m <sup>3</sup> ]  | water density                                                        |
| Rouwav                        | #VR04#                         | [-]                   | Stress formulation due to wave forces:                               |
| Roumet                        | #C#                            | [-]                   | Bottom roughness formulation: #C# = Chezy                            |
| Ccofu                         | 50                             | [m <sup>0.5</sup> /s] | Chezy value in u                                                     |
| Ccofv                         | 50                             | [m <sup>0.5</sup> /s] | Chezy value in v                                                     |
| Vicouv                        | 1                              | [m <sup>2</sup> /s]   | Horizontal eddy viscosity                                            |
| Dicouv                        | 1                              | [m <sup>2</sup> /s]   | Horizontal eddy diffusivity                                          |
| Cstbnd                        | #YES#                          | [-]                   | Neumann sediment concentration boundary                              |
| <b>mor file</b>               |                                |                       |                                                                      |
| [Morphology]                  |                                |                       |                                                                      |
| MorFac                        | 10-20                          | [-]                   | Morphological scale factor                                           |
| MorStt                        | 1440                           | [min]                 | Spin-up interval to start of morphological changes                   |
| Thresh                        | 0.05                           | [m]                   | Threshold sediment thickness for transport and erosion reduction     |
| AlfaBs                        | 1                              | [-]                   | Streamwise bed gradient factor for bed load transport                |
| AlfaBn                        | 1.5                            | [-]                   | Transverse bed gradient factor for bed load transport                |
| Sus                           | see table 3                    | [-]                   | Multiplication factor for suspended sediment reference concentration |
| Bed                           | see table 3                    | [-]                   | Multiplication factor for bed-load transport vector magnitude        |
| SusW                          | see table 3                    | [-]                   | Wave-related suspended sed. transport factor                         |
| BedW                          | see table 3                    | [-]                   | Wave-related bed-load sed. transport factor                          |
| SedThr                        | 0.3-0.4                        | [m]                   | Minimum water depth for sediment computations                        |
| ThetSD                        | 0.5                            | [-]                   | Factor for erosion of adjacent dry cells                             |
| HMaxTH                        | 0.001                          | [m]                   | Max depth for variable THETSD. Set < SEDTHR to use global value only |
| NeuBcSand                     | FALSE                          | [-]                   | Equilibrium sand concentration profile at inflow boundaries          |
| <b>sed file</b>               |                                |                       |                                                                      |
| [SedimentFileInformation]     |                                |                       |                                                                      |
| [SedimentOverall]             |                                |                       |                                                                      |
| Cref                          | 1600                           | [kg/m <sup>3</sup> ]  | CSoil Reference density for hindered settling calculations           |
| IopSus                        | 0                              | [-]                   | option for determining suspended sediment diameter                   |
| [Sediment]                    |                                |                       |                                                                      |
| SedTyp                        | sand                           | [-]                   | Must be "sand", "mud" or "bedload"                                   |
| RhoSol                        | 2650                           | [kg/m <sup>3</sup> ]  | Specific density                                                     |

|                                   |         |                      |                                         |
|-----------------------------------|---------|----------------------|-----------------------------------------|
| SedDia                            | 0.00025 | [m]                  | Median sediment diameter (D50)          |
| CDryB                             | 1600    | [kg/m <sup>3</sup> ] | Dry bed density                         |
| IniSedThick                       | 10      | [m]                  | Initial sediment layer thickness at bed |
| FacDSS                            | 0.8     | [-]                  | FacDss * SedDia                         |
| <b>tra file</b>                   |         |                      |                                         |
| [TransportFormulaFileInformation] |         |                      |                                         |
| FileVersion                       | 1       |                      |                                         |
| [TransportFormula]                |         |                      |                                         |
| Number                            | -2      | [-]                  | Van Rijn (2007): TRANSPOR2004           |
| Wform                             | 1-2     | [-]                  | Wave parameterization: 1 = IH ; 2 = RUE |

## Wave model

| Code            | Value          | Unit                              | Description                                                      |
|-----------------|----------------|-----------------------------------|------------------------------------------------------------------|
| <b>mdw file</b> |                |                                   |                                                                  |
| [General]       |                |                                   |                                                                  |
| SimMode         | stationary     |                                   | simulation mode: stationary, quasi-stationary, non-stationary    |
| DirConvention   | nautical       |                                   | direction specification convention: nautical, cartesian          |
| [Constants]     |                |                                   |                                                                  |
| Gravity         | 9.81           | [m/s <sup>2</sup> ]               | gravitational acceleration                                       |
| WaterDensity    | 1025           | [kg/m <sup>3</sup> ]              | water density                                                    |
| NorthDir        | 90             | [deg]                             | direction of north relative to x axis                            |
| MinimumDepth    | 0.05           | [m]                               | minimum water depth for computation                              |
| [Processes]     |                |                                   |                                                                  |
| GenModePhys     | 3              | [-]                               | generation mode of physics: 3 for third-generation               |
| Breaking        | true           | [-]                               | include wave breaking                                            |
| BreakAlpha      | 1              | [-]                               | alpha coefficient for wave breaking                              |
| BreakGamma      | 0.73           | [-]                               | gamma coefficient for wave breaking                              |
| Triads          | false          | [-]                               | include triads                                                   |
| TriadsAlpha     | 0.1            |                                   | alpha coefficient for triads                                     |
| TriadsBeta      | 2.2            |                                   | beta coefficient for triads                                      |
| BedFriction     | jonswap        | [-]                               | bed friction type                                                |
| BedFricCoef     | 0.067          | [m <sup>2</sup> /s <sup>3</sup> ] | bed friction coefficient                                         |
| Diffraction     | false          | [-]                               | include diffraction                                              |
| WindGrowth      | false          | [-]                               | include wind growth                                              |
| WhiteCapping    | Komen          | [-]                               | white capping                                                    |
| Quadruplets     | false          | [-]                               | include quadruplets                                              |
| Refraction      | true           | [-]                               | include refraction                                               |
| FreqShift       | true           | [-]                               | include frequency shifting in frequency space                    |
| WaveForces      | Dissipation 3d | [-]                               | method of wave force computation                                 |
| [Numerics]      |                |                                   |                                                                  |
| DirSpaceCDD     | 0.5            | [-]                               | discretisation in directional space: 0 for central, 1 for upwind |
| FreqSpaceCSS    | 0.5            | [-]                               | discretisation in frequency space: 0 for central, 1 for upwind   |

|                |                  |       |                                                                                                                                             |
|----------------|------------------|-------|---------------------------------------------------------------------------------------------------------------------------------------------|
| RChHsTm01      | 0.02             | [-]   | relative change of wave height or mean wave period with respect to local value                                                              |
| RChMeanHs      | 0.02             | [-]   | relative change of wave height with respect to model-wide average wave height                                                               |
| RChMeanTm01    | 0.02             | [-]   | relative change of mean wave period with respect to model-wide average mean wave period                                                     |
| PercWet        | 98               | [%]   | percentage of points included in simulation at which convergence criteria must be satisfied                                                 |
| MaxIter        | 15               | [-]   | maximum number of iterations for convergence                                                                                                |
| [Domain]       |                  |       |                                                                                                                                             |
| FlowBedLevel   | 2                | [-]   | exchange of variable between wave and hydrodynamic modules: 0 = “don’t use”, 1 = “use but don’t extend”, 2 = “use and extend” if necessary. |
| FlowWaterLevel | 2                | [-]   |                                                                                                                                             |
| FlowVelocity   | 2                | [-]   |                                                                                                                                             |
| FlowWind       | 0                | [-]   |                                                                                                                                             |
| DirSpace       | circle           | [-]   | directional space: circle, sector                                                                                                           |
| NDir           | 36               | [-]   | number of directional bins                                                                                                                  |
| StartDir       | 0                | [deg] | start direction in case of sector directional space                                                                                         |
| EndDir         | 0                | [deg] | end direction in case of sector directional space                                                                                           |
| FreqMin        | 0.05             | [Hz]  | minimum frequency                                                                                                                           |
| FreqMax        | 1                | [Hz]  | maximum frequency                                                                                                                           |
| NFreq          | 24               | [-]   | number of frequencies                                                                                                                       |
| [Boundary]     |                  |       |                                                                                                                                             |
| Name           | west/north/south | [-]   | boundary name                                                                                                                               |
| Definition     | orientation      | [-]   | definition type (orientation, grid-coordinates, xy-coordinates)                                                                             |
| Orientation    | west/north/south | [-]   | boundary orientation                                                                                                                        |
| SpectrumSpec   | parametric       | [-]   | spectrum specification type                                                                                                                 |
| SpShapeType    | jonswap          | [-]   | spectrum shape type in case of parametric spectrum specification                                                                            |
| PeriodType     | peak             | [-]   | wave period type in case of parametric spectrum specification                                                                               |
| DirSpreadType  | power            | [-]   | directional spreading type                                                                                                                  |
| PeakEnhanceFac | 3.3              | [-]   | peak enhancement factor in case of jonswap spectrum                                                                                         |
| GaussSpread    | 0.01             | [-]   | width of spectral distribution in case of gaussian spectrum                                                                                 |
